# Supplementary material for: Riluzole treatment, survival and diagnostic criteria in Parkinson plus disorders: The NNIPPS Study
Source: PubMed Central journal article supplement — Brain. 2008 Nov 23;132(1):156–71. doi: 10.1093/brain/awn291 (PMC2638696; doi:10.1093/brain/awn291), 2008-11-23
Supplement: awn291_2.pdf [file awn291_2.pdf]

**Supplementary Table 2.**

Response of patients to levodopa treatment at inclusion and history of levodopa response. At the inclusion visit, investigators were asked to score patients' response to levodopa treatment from case records and/or patients' and care-givers' subjective assessment to evaluate the current and best-ever response to levodopa treatment. Data are number of patients (% of treated in strata). Patients never treated with levodopa therapy prior to entry amounted to about 15% in both groups.

| Response to levodopa treatment | PSP (N= 362) |                  | MSA (N= 398) |                  |
|--------------------------------|--------------|------------------|--------------|------------------|
|                                | At inclusion | Before inclusion | At inclusion | Before inclusion |
| Number of treated patients     | 307 (84.8)   | 310 (85.6)       | 334 (83.9)   | 339 (85.2)       |
| less than 25% improvement      | 269 (87.6)   | 243 (78.4)       | 257 (76.9)   | 229 (67.6)       |
| 25 to 50% improvement          | 38 (12.4)    | 59 (19.0)        | 72 (21.6)    | 79 (23.3)        |
| more than 50% improvement      | 0 (0.0)      | 8 (2.6)          | 5 (1.5)      | 31 (9.1)         |
